# Supplementary material for: Identification of Novel Targets of CSL-Dependent Notch Signaling in Hematopoiesis
Source: PLoS One. 2011 May 26;6(5):e20022. doi: 10.1371/journal.pone.0020022 (PMC3102675; doi:10.1371/journal.pone.0020022)
Supplement: Table S2 — CSL binding sites within 2 kb of the TSS of microRNAs. (XLS) [file pone.0020022.s002.xls]

## Sheet: Sheet1
Table S2 CSL binding sites within 2kb of the TSS of miicroRNAs
MicroRNA	Distance (bp)
mmu-let-7a-1	-1660
mmu-mir-339	-995
mmu-mir-130b	-945
mmu-mir-181d	-711
mmu-mir-301b	-597
mmu-mir-181c	-545
mmu-mir-34c	-437
mmu-mir-503	-271
mmu-mir-423	-259
mmu-mir-145	-80
mmu-mir-322	12
mmu-mir-34b	93
mmu-mir-302b	250
mmu-mir-141	375
mmu-mir-302c	377
mmu-mir-363	389
mmu-mir-144	435
mmu-mir-302a	513
mmu-mir-92a	546
mmu-mir-290	626
mmu-mir-302d	641
mmu-mir-19b	683
mmu-mir-367	753
mmu-mir-200c	782
mmu-mir-20b	814
mmu-mir-291a	919
mmu-mir-212	934
mmu-mir-18b	1033
mmu-mir-292	1189
mmu-mir-106a	1198
mmu-mir-132	1218
mmu-mir-142	1277
mmu-mir-143	1290
mmu-mir-291b	1482
mmu-mir-451	1496
mmu-mir-351	1543
mmu-mir-22	1551
